# Supplementary material
Source: PubMed Central journal article supplement (PMC4018956)
Supplement: jn.113.187161_nutrition187161SupplementaryData1.pdf [file jn.113.187161_nutrition187161SupplementaryData1.pdf]

**SUPPLEMENTAL TEXT: STATISTICAL METHODS**

To quantify the association between diarrhea and linear and ponderal (weight) growth velocity, we modeled growth as a piecewise linear function of age with knots at 3, 6, 12, and 18 months (Figures 1 and 2).

$$y_{ij} = \beta_0 + \beta_1(\alpha, d) \times t_{ij} + \beta_2(\delta, d) \times (t_{ij} - 3)_+ + \beta_3(\phi, d) \times (t_{ij} - 6)_+ + \beta_4(\gamma, d) \times (t_{ij} - 12)_+ + \beta_5(\eta, d) \times (t_{ij} - 18)_+ + \beta_6 \times sex + \sum_{i=7}^{12} \beta_i \times I(study_i) + b_{0j} + b_{1j} \times t_{ij} + \varepsilon_{ij}$$

In this model, y is either length or weight,  $\beta_0$  is the intercept and  $\{\beta_1, \beta_2, \beta_3, \beta_4, \beta_5\}$  are piecewise linear splines of age. Also included in the model is a coefficient for sex and indicator variables for each study. We accounted for heterogeneity in growth between children using random effects for the intercept ( $b_0$ ) and age ( $b_1$ ) by child. We used a first-order continuous autoregressive error process by age to model serial correlation within child. Diarrhea burden was added to the model using the following for each of the time periods where d represents the percent of days with diarrhea in each period:

$$\begin{aligned} \beta_1(\alpha, d) &= \alpha_1 + \alpha_2 \times d_{[0-3]} \\ \beta_2(\delta, d) &= \delta_1 + \delta_2 \times d_{(3-6]} + \delta_3 \times d_{[0-3]} \\ \beta_3(\phi, d) &= \phi_1 + \phi_2 \times d_{(6-12]} + \phi_3 \times d_{(3-6]} \\ \beta_4(\gamma, d) &= \gamma_1 + \gamma_2 \times d_{(12-18]} + \gamma_3 \times d_{(6-12]} \\ \beta_5(\eta, d) &= \eta_1 + \eta_2 \times d_{(18-24]} + \eta_3 \times d_{(12-18]} \end{aligned}$$

The slope for the first period (0-3 months) is  $\beta_1$ , which is made up of two parts:  $\alpha_1$  is the average length velocity of children without diarrhea ( $d=0$ ), and  $\alpha_2$  is the change in growth velocity associated with each additional percent increase in diarrhea prevalence. The slope for the second period (3.01-6 months) is  $\beta_1 + \beta_2$ .  $\beta_2$  represents the change in slope during the 3.01-6 month period and consists of:  $\delta_1$  is the change in slope from 0-3 months to 3.01-6 months in children without diarrhea in either period,  $\delta_2$  is the change associated with each additional percent

## Online Supporting Material

increase in diarrhea prevalence in current period, and  $\delta_3$  is the change associated with each additional percent increase in diarrhea in the previous period. Similarly, the growth velocity for the 6.01 to 12 month period is the sum of  $\beta_1 + \beta_2 + \beta_3$ , the growth velocity for the 12.01 to 18 month period is  $\beta_1 + \beta_2 + \beta_3 + \beta_4$ , and the growth velocity for the 18.01 to 24 month period is  $\beta_1 + \beta_2 + \beta_3 + \beta_4 + \beta_5$ .

**SUPPLEMENTAL FIGURE 1. Conceptual framework for statistical model.**

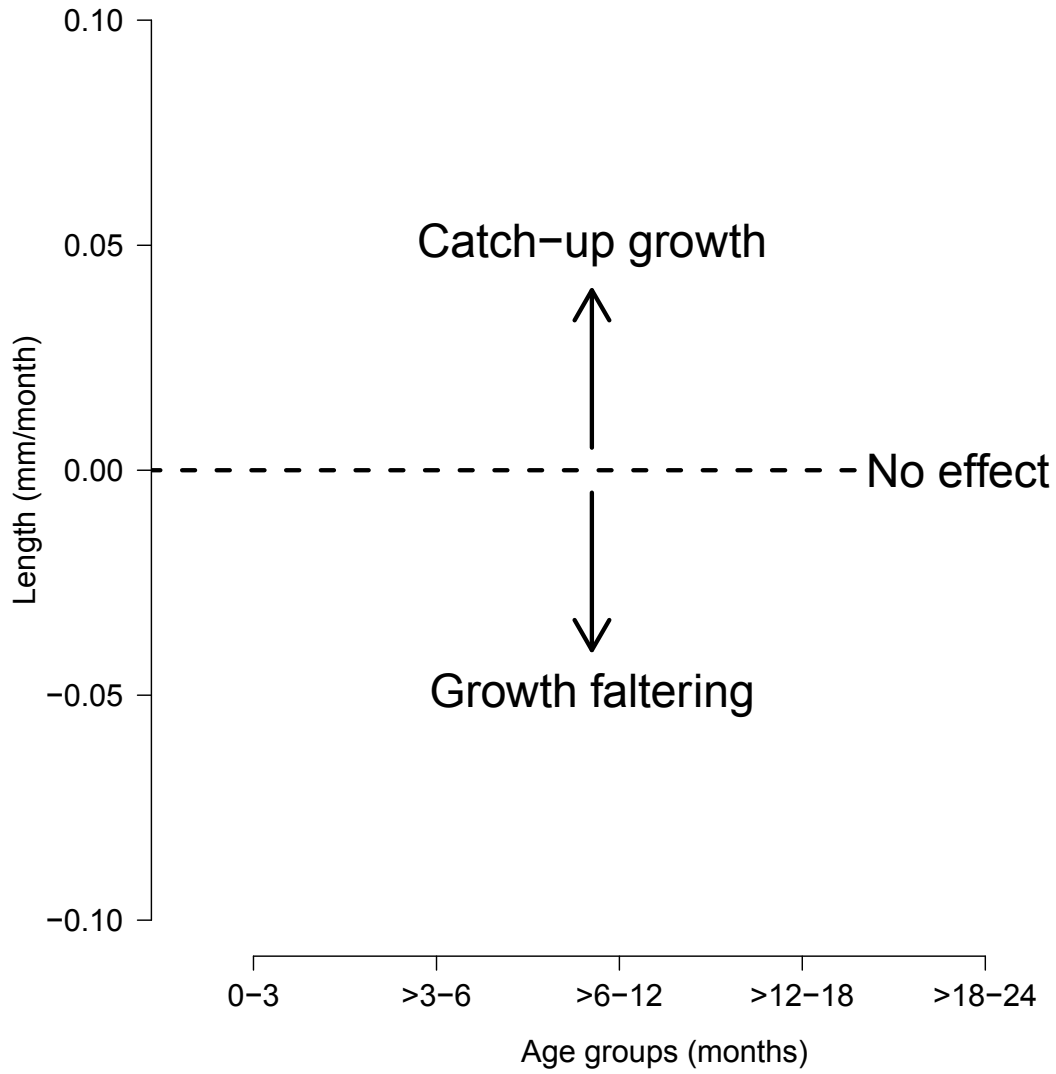

**SUPPLEMENTAL FIGURE 2. Estimated lengths at 24 months of age, by percent diarrhea and by cohort study, based on model that includes age spline with knots at 3, 6, 12, and 18 months of age, and interactions between age spline and diarrhea prevalence during current and previous period. PE85: Peru 1985, PE89: Peru 1989, PE95: Peru 1995, BR89: Brazil 1989, GB87: Guinea-Bissau 1987, GB96: Guinea-Bissau 1996, BG93: Bangladesh 1993.**

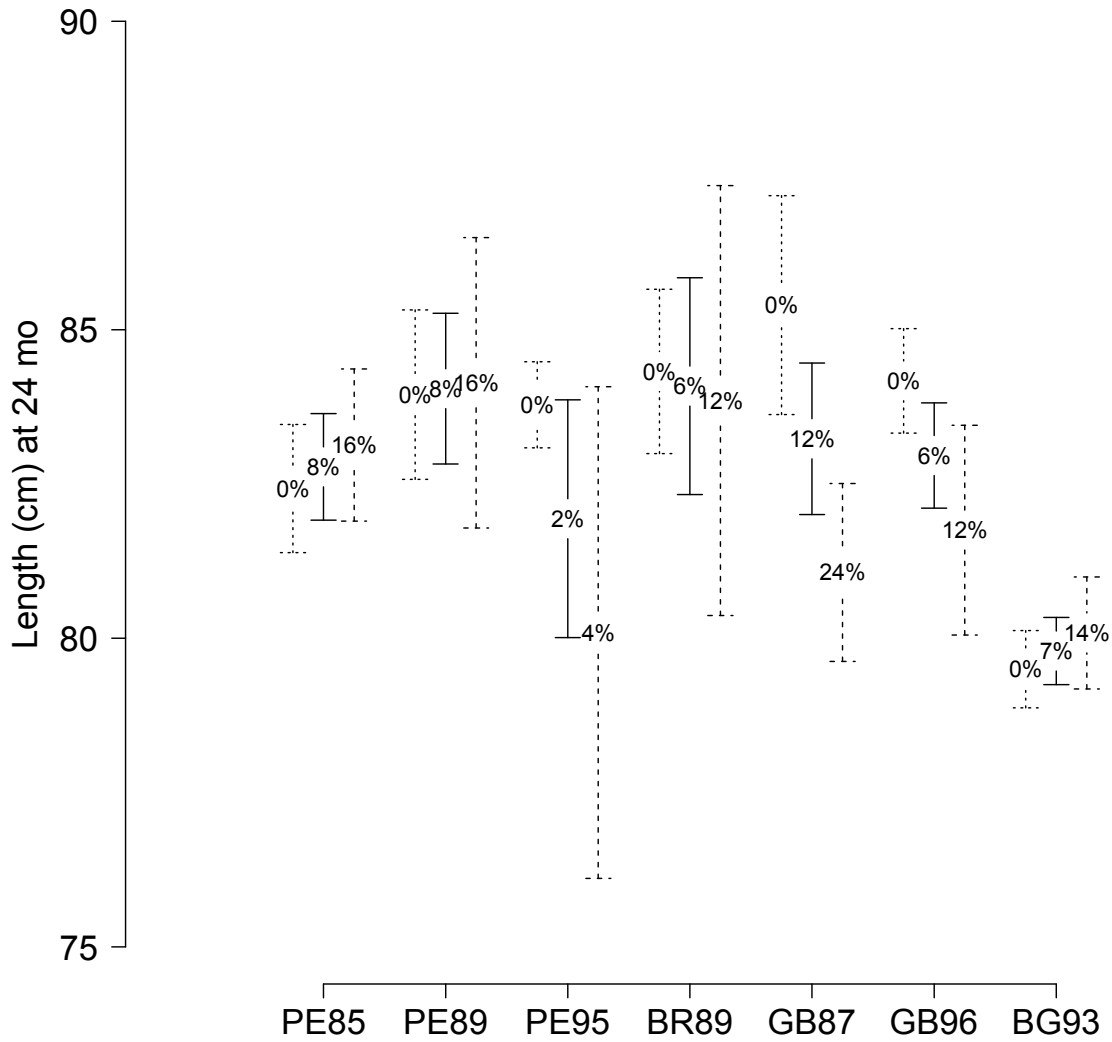

**SUPPLEMENTAL TABLE 1. General description of studies included in the combined dataset including anthropometry data collected in children <24 months of age.**

| <b>Dates</b> | <b>Setting</b>                | <b>Design</b>    | <b>Purpose</b>                                      |
|--------------|-------------------------------|------------------|-----------------------------------------------------|
| 1985-1987    | Lima, Peru (urban)            | Observational    | Effects of diarrhea on growth                       |
| 1989-1991    | Lima, Peru (urban)            | Observational    | Effects of diarrhea on growth                       |
| 1995-1998    | Lima, Peru (urban)            | Observational    | Effects of diarrhea on growth                       |
| 1989-2000    | Goncalves, Brazil (urban)     | Observational    | Effects of diarrhea on growth                       |
| 1987-1990    | Bandim, Guinea-Bissau (urban) | Observational    | Identify risk factors for diarrhea in Africa        |
| 1996-1998    | Bandim, Guinea-Bissau (urban) | Randomized trial | Effects of dietary management of diarrhea on growth |
| 1993-1996    | Mirzapur, Bangladesh (rural)  | Observational    | Identify risk factors for diarrhea                  |

**SUPPLEMENTAL TABLE 2. Parameters from length model associated with percent diarrhea in current and previous time period.**

|                                                       |                                              | Estimate in cm±SE |              |               |
|-------------------------------------------------------|----------------------------------------------|-------------------|--------------|---------------|
|                                                       |                                              | Overall           | Girls        | Boys          |
|                                                       | Intercept                                    | 51.2±0.2          | 50.0±0.2     | 50.9±0.2      |
|                                                       | Age <sup>1</sup>                             | 3.4±0.02          | 3.4±0.04     | 3.5±0.03      |
|                                                       | Age <sub>(3-6)</sub>                         | -1.5±0.04         | -1.5±0.05    | -1.5±0.05     |
|                                                       | Age <sub>(6-12)</sub>                        | -0.8±0.02         | -0.7±0.03    | -0.8±0.03     |
|                                                       | Age <sub>(12-18)</sub>                       | -0.2±0.02         | -0.2±0.02    | -0.3±0.02     |
|                                                       | Age <sub>(18-24)</sub>                       | -0.1±0.02         | -0.1±0.03    | -0.08±0.03    |
|                                                       | Peru 1985 (27)                               | -0.1±0.2          | -0.1±0.3     | -0.2±0.3      |
|                                                       | Peru 1989 (11)                               | 0.1±0.2           | -0.1±0.3     | 0.4±0.4       |
|                                                       | Peru 1995 (13)                               | -0.1±0.2          | -0.2±0.3     | -0.01±0.3     |
|                                                       | Brazil 1989 (12)                             | -0.4±0.2          | -0.4±0.3     | -0.5±0.3      |
|                                                       | Guinea-Bissau 1987 (28)                      | -0.4±0.3          | -0.5±0.3     | -0.2±0.4      |
|                                                       | Guinea-Bissau 1996 (29)                      | Ref               | Ref          | Ref           |
|                                                       | Bangladesh 1993 (30)                         | -1.4±0.2          | -1.6±0.3     | -1.2±0.3      |
|                                                       | Sex (girls=1)                                | -1.5±0.1          | -            | -             |
|                                                       | Baseline WAZ <sup>2</sup> <-1                | -2.6±0.2          | -2.5±0.2     | -2.6±0.2      |
| Interaction<br>with current<br>diarrhea<br>prevalence | Age:d <sup>3</sup> <sub>[0-3]</sub>          | -0.001±0.001      | -0.003±0.002 | -0.0001±0.002 |
|                                                       | Age <sub>(t-3)+</sub> :d <sub>(3-6)</sub>    | -0.004±0.001      | -0.002±0.002 | -0.006±0.002  |
|                                                       | Age <sub>(t-6)+</sub> :d <sub>(6-12)</sub>   | -0.003±0.001      | -0.002±0.001 | -0.005±0.001  |
|                                                       | Age <sub>(t-12)+</sub> :d <sub>(12-18)</sub> | -0.002±0.001      | -0.003±0.002 | -0.002±0.002  |
|                                                       | Age <sub>(t-18)+</sub> :d <sub>(18-24)</sub> | -0.003±0.001      | 0.0008±0.002 | -0.006±0.002  |
| Interaction<br>with previous<br>diarrhea              | Age <sub>(t-3)+</sub> :d <sub>(0-3)</sub>    | 0.001±0.002       | 0.003±0.002  | 0.0002±0.002  |
|                                                       | Age <sub>(t-6)+</sub> :d <sub>(3-6)</sub>    | 0.003±0.001       | 0.002±0.002  | 0.006±0.002   |
|                                                       | Age <sub>(t-12)+</sub> :d <sub>(6-12)</sub>  | 0.004±0.001       | 0.004±0.001  | 0.004±0.002   |
|                                                       | Age <sub>(t-18)+</sub> :d <sub>(12-18)</sub> | 0.004±0.002       | 0.003±0.003  | 0.005±0.003   |

<sup>1</sup> Age spline variable with knots at 3, 6, 12, and 18 months of age

<sup>2</sup> WAZ: weight-for-age Z-score

<sup>3</sup> d refers to percent of days during the period with diarrhea

**SUPPLEMENTAL TABLE 3. Estimates of length, height-for-age Z-scores (HAZ), weight, and weight-for-age Z-scores (WAZ) at 24 months of age.**

| Diarrhea burden             | Boys <sup>1</sup>        |                   | Girls                    |                   |
|-----------------------------|--------------------------|-------------------|--------------------------|-------------------|
|                             | Length in cm<br>(95% CI) | HAZ<br>(95% CI)   | Length in cm<br>(95% CI) | HAZ<br>(95% CI)   |
| No diarrhea                 | 84.0 (83.6, 84.4)        | -1.0 (-1.2, -0.9) | 82.5 (82.1, 82.9)        | -1.0 (-1.1, -0.9) |
| Average burden <sup>2</sup> | 83.6 (83.2, 84.0)        | -1.2 (-1.3, -1.0) | 82.1 (81.7, 82.5)        | -1.1 (-1.3, -1.0) |
| 2x average burden           | 83.2 (82.8, 83.6)        | -1.3 (-1.4, -1.2) | 81.8 (81.4, 82.2)        | -1.2 (-1.3, -1.1) |

  

| Diarrhea burden   | Boys <sup>1</sup>        |                   | Girls                    |                   |
|-------------------|--------------------------|-------------------|--------------------------|-------------------|
|                   | Weight in kg<br>(95% CI) | WAZ<br>(95% CI)   | Weight in kg<br>(95% CI) | WAZ<br>(95% CI)   |
| No diarrhea       | 11.5 (11.3, 11.7)        | -0.5 (-0.6, -0.3) | 11.1 (10.9, 11.3)        | -0.3 (-0.4, -0.1) |
| Average burden    | 11.4 (11.3, 11.5)        | -0.6 (-0.6, -0.5) | 11.0 (10.9, 11.1)        | -0.4 (-0.4, -0.3) |
| 2x average burden | 11.3 (11.1, 11.5)        | -0.6 (-0.8, -0.5) | 10.9 (10.7, 11.1)        | -0.4 (-0.6, -0.3) |

<sup>1</sup> The models were run overall with sex as a covariate in the model.

<sup>2</sup> The average burden of diarrhea overall is 5%, 7%, 8%, 7%, and 5% of days with diarrhea in the 0-3, >3-6, >6-12, >12-18, and >18-24 month age groups, respectively.

**SUPPLEMENTAL TABLE 4. Parameters from length model associated with percent diarrhea in current and previous time period.**

|                                                       | Overall estimate in<br>kg (SE)                            | Girls estimate in<br>kg (SE) | Boys estimate in<br>kg (SE) |
|-------------------------------------------------------|-----------------------------------------------------------|------------------------------|-----------------------------|
| Intercept                                             | 3.7±0.05                                                  | 3.3±0.06                     | 3.6±0.07                    |
| Age <sup>1</sup>                                      | 1.0±0.01                                                  | 0.91±0.02                    | 1.0±0.01                    |
| Age <sub>(3-6)</sub>                                  | -0.5±0.02                                                 | -0.44±0.02                   | -0.5±0.02                   |
| Age <sub>(6-12)</sub>                                 | -0.2±0.01                                                 | -0.23±0.02                   | -0.3±0.02                   |
| Age <sub>(12-18)</sub>                                | -0.1±0.01                                                 | -0.07±0.01                   | -0.08±0.01                  |
| Age <sub>(18-24)</sub>                                | -0.01±0.01                                                | 0.01±0.01                    | -0.03±0.01                  |
| Peru 1985 (27)                                        | -0.2±0.1                                                  | -0.1±0.1                     | -0.3±0.1                    |
| Peru 1989 (11)                                        | 0.2±0.1                                                   | 0.2±0.1                      | 0.1±0.1                     |
| Peru 1995 (13)                                        | 0.4±0.1                                                   | 0.5±0.1                      | 0.2±0.1                     |
| Brazil 1989 (12)                                      | -0.003±0.1                                                | 0.1±0.1                      | -0.1±0.1                    |
| Guinea-Bissau 1987 (28)                               | -0.1±0.1                                                  | -0.2±0.1                     | -0.1±0.1                    |
| Guinea-Bissau 1996 (29)                               | Ref                                                       | Ref                          | Ref                         |
| Bangladesh 1993 (30)                                  | -0.4±0.1                                                  | -0.5±0.1                     | -0.4±0.1                    |
| Sex (girls=1)                                         | -0.4±0.04                                                 | -                            | -                           |
| Baseline WAZ <sup>2</sup> <-1                         | -1.0±0.05                                                 | -0.9±0.1                     | -1.0±0.1                    |
| Interaction<br>with current<br>diarrhea<br>prevalence | Age:d <sup>3</sup> <sub>[0-3]</sub> -0.0002±0.001         | -0.0009±0.001                | 0.0003±0.001                |
|                                                       | Age <sub>(t-3)+</sub> :d <sub>(3-6)</sub> -0.002±0.001    | -0.0004±0.001                | -0.004±0.001                |
|                                                       | Age <sub>(t-6)+</sub> :d <sub>(6-12)</sub> -0.002±0.0004  | -0.002±0.002                 | -0.002±0.001                |
|                                                       | Age <sub>(t-12)+</sub> :d <sub>(12-18)</sub> -0.002±0.001 | -0.001±0.001                 | -0.002±0.001                |
|                                                       | Age <sub>(t-18)+</sub> :d <sub>(18-24)</sub> -0.002±0.001 | -0.002±0.001                 | -0.001±0.001                |
| Interaction<br>with previous<br>diarrhea              | Age <sub>(t-3)+</sub> :d <sub>(0-3)</sub> 0.0002±0.001    | 0.001±0.001                  | -0.0002±0.001               |
|                                                       | Age <sub>(t-6)+</sub> :d <sub>(3-6)</sub> 0.002±0.001     | 0.001±0.001                  | 0.004±0.001                 |
|                                                       | Age <sub>(t-12)+</sub> :d <sub>(6-12)</sub> 0.003±0.001   | 0.004±0.001                  | 0.003±0.001                 |
|                                                       | Age <sub>(t-18)+</sub> :d <sub>(12-18)</sub> 0.004±0.001  | 0.002±0.001                  | 0.005±0.001                 |

<sup>1</sup> Age spline variable with knots at 3, 6, 12, and 18 months of age

<sup>2</sup> WAZ: weight-for-age Z-score

<sup>3</sup> d refers to percent of days during the period with diarrhea
